# Supplementary material for: Influence of the Human Field of View on Visual and Non-visual Quantities in Indoor Environments
Source: Preprints.org preprint supplement (doi:10.20944/preprints202306.1028.v1), 2023-06-14
Supplement: Supplementary file 2 [file rel_Illuminance.xlsx]

## Sheet: Tabelle1
X	Y	Type	Run	Illuminance
0	90	Preliminary	1	0.399741
0	85	Preliminary	1	0.373915
0	80	Preliminary	1	0.365347
0	75	Preliminary	1	0.498314
0	70	Preliminary	1	0.679256
0	65	Preliminary	1	0.889887
0	60	Preliminary	1	1.31474
0	50	Preliminary	1	596.983
0	40	Preliminary	1	748.096
0	30	Preliminary	1	859.097
0	20	Preliminary	1	939.102
0	10	Preliminary	1	994.582
0	0	Preliminary	1	1015.31
90	0	Preliminary	4	0.32897
85	0	Preliminary	4	1.27334
80	0	Preliminary	4	73.4066
75	0	Preliminary	4	176.371
70	0	Preliminary	4	271.699
65	0	Preliminary	4	361.492
60	0	Preliminary	4	449.856
50	0	Preliminary	4	608.558
40	0	Preliminary	4	743.993
30	0	Preliminary	4	855.49
20	0	Preliminary	4	940.409
10	0	Preliminary	4	993.686
0	0	Preliminary	4	1015.85
0	-90	Preliminary	6	3.41266
0	-85	Preliminary	6	4.17584
0	-80	Preliminary	6	4.87538
0	-75	Preliminary	6	5.63623
0	-70	Preliminary	6	6.99898
0	-65	Preliminary	6	352.772
0	-60	Preliminary	6	456.37
0	-50	Preliminary	6	616.319
0	-40	Preliminary	6	752.025
0	-30	Preliminary	6	862.28
0	-20	Preliminary	6	943.987
0	-10	Preliminary	6	1013.2
0	0	Preliminary	6	1012.85
0	90	FOV occlusion	8	0.444176
0	85	FOV occlusion	8	0.433109
0	80	FOV occlusion	8	0.455086
0	75	FOV occlusion	8	0.530243
0	70	FOV occlusion	8	0.880428
0	65	FOV occlusion	8	1.18618
0	60	FOV occlusion	8	1.90429
0	50	FOV occlusion	8	171.391
0	40	FOV occlusion	8	757.685
0	30	FOV occlusion	8	868.978
0	20	FOV occlusion	8	951.075
0	10	FOV occlusion	8	1001.73
0	0	FOV occlusion	8	1022.41
90	0	FOV occlusion	9	0.480155
85	0	FOV occlusion	9	1.39902
80	0	FOV occlusion	9	70.4453
75	0	FOV occlusion	9	176.435
70	0	FOV occlusion	9	272.585
65	0	FOV occlusion	9	364.291
60	0	FOV occlusion	9	451.962
50	0	FOV occlusion	9	612.653
40	0	FOV occlusion	9	752.242
30	0	FOV occlusion	9	865.19
20	0	FOV occlusion	9	949.585
10	0	FOV occlusion	9	1003.59
0	0	FOV occlusion	9	1024.2
0	-90	FOV occlusion	10	3.03525
0	-85	FOV occlusion	10	3.7836
0	-80	FOV occlusion	10	4.37299
0	-75	FOV occlusion	10	6.19564
0	-70	FOV occlusion	10	286.236
0	-65	FOV occlusion	10	376.713
0	-60	FOV occlusion	10	463.123
0	-50	FOV occlusion	10	623.74
0	-40	FOV occlusion	10	758.901
0	-30	FOV occlusion	10	870.336
0	-20	FOV occlusion	10	951.192
0	-10	FOV occlusion	10	1000.76
0	0	FOV occlusion	10	1017.76
0	90	Jeti	11	0.316462
0	85	Jeti	11	9.05599
0	80	Jeti	11	117.593
0	75	Jeti	11	215.065
0	70	Jeti	11	306.91
0	65	Jeti	11	393.676
0	60	Jeti	11	478.27
0	50	Jeti	11	632.86
0	40	Jeti	11	758.956
0	30	Jeti	11	860.96
0	20	Jeti	11	938.886
0	10	Jeti	11	985.203
0	0	Jeti	11	1000.77
90	0	Jeti	12	0.796398
85	0	Jeti	12	19.942
80	0	Jeti	12	131.739
75	0	Jeti	12	227.602
70	0	Jeti	12	320.779
65	0	Jeti	12	409.6
60	0	Jeti	12	493.296
50	0	Jeti	12	648.4
40	0	Jeti	12	775.924
30	0	Jeti	12	879
20	0	Jeti	12	950.821
10	0	Jeti	12	991.134
0	0	Jeti	12	1000.77
0	-90	Jeti	13	0.316462
0	-85	Jeti	13	9.05599
0	-80	Jeti	13	117.593
0	-75	Jeti	13	215.065
0	-70	Jeti	13	306.91
0	-65	Jeti	13	393.676
0	-60	Jeti	13	478.27
0	-50	Jeti	13	632.86
0	-40	Jeti	13	758.956
0	-30	Jeti	13	860.96
0	-20	Jeti	13	938.886
0	-10	Jeti	13	985.203
0	0	Jeti	13	1000.77
